# Supplementary material
Source: MDPI journal article supplement (https://www.mdpi.com/2673-9976/20/1/32)
Supplement: s1 [file s1]

## Phytochemical Screening and Antioxidant activity of *Trichosanthes cucumerina*, *Momordica charantia* var *muricata* and *Luffa acutangula*

Vikas Gautam<sup>1\*</sup>, Anandika Suryavanshi<sup>2</sup>, Naushad Ahmad Shah<sup>3</sup>, Kumar Gaurav Bajpai<sup>4\*</sup>, Syed Shabihe Raza Baqri<sup>5</sup>, T. S. Naqvi<sup>6</sup> and A. M. Saxena<sup>7</sup>

<sup>1</sup>Department of Zoology, University of Lucknow, Lucknow 226007, U.P. India; [vikasgautam209@gmail.com](mailto:vikasgautam209@gmail.com)

Correspondence: [vikasgautam209@gmail.com](mailto:vikasgautam209@gmail.com); Tel.: +91-8604675461 (K.G.B.) [drkumargaurav\\_08@yahoo.com](mailto:drkumargaurav_08@yahoo.com)

### INTRODUCTION

- To scavenge free radicals and reduce oxidative damage, antioxidant supplements or foods with high antioxidant content are required.
- Cucurbitaceae, the family of highly diversified form of plant species often called gourd family.
- The potential of antioxidants to promote health benefits and food stability has led to an increased interest in the interaction between them. Because of their powerful antioxidant properties, the majority of vegetables from the cucurbitaceae family have a rich chemical makeup.

### OBJECTIVES

The aim of this study was to evaluate the phytochemical & antioxidant activity of *Trichosanthes cucumerina*, *Luffa acutangula*, *Momordica charantia* var *muricata* ethanolic whole plant extracts in order to find possible sources for future novel antioxidants.

### MATERIALS AND METHODS

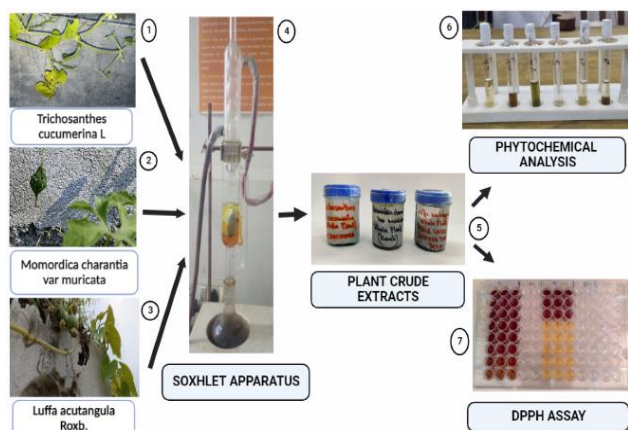

1,2,3 represents the tested plants used in this analysis, 4 represents the method used for the plant extraction, 5 represents the ethanolic crude extracts used for the further experimentation of Phytochemical screening (Harborne JB *et al* 1984, Harborne AJ *et al* 1998) & DPPH assay (Koleva II *et al* 2002) 6,7 respectively.

### ACKNOWLEDGEMENTS

The authors acknowledge the Head, Department of Zoology, University of Lucknow, Lucknow for providing facilities to carry out this work. We also want to thanks Dr. Akash Asthana, Assistant Professor, Department of Statistics, University of Lucknow, Lucknow for giving their help in data analysis.

### RESULTS

**Table 1.** Showing the phytochemical analysis results for the TC, LA & MCM whole plants.

| Name of Phytochemical | Name of Chemical Tests   | TC | LA | MCM |
|-----------------------|--------------------------|----|----|-----|
| Alkaloid              | Mayer's Reagent Test     | +  | -  | +   |
| Glycosides            | Keller-Killiani Test     | +  | -  | -   |
| Phenols               | Ferric chloride test     | +  | +  | +   |
| Proteins              | Xanthoprotic test        | +  | -  | +   |
| Saponins              | Froth test               | -  | +  | +   |
| Steroids              | Liebermann Burchard test | +  | +  | +   |

+: Present; -: Absent; TC: *Trichosanthes cucumerina*, LA: *Luffa Acutangula*; MCM: *Momordica charantia* var *muricata*

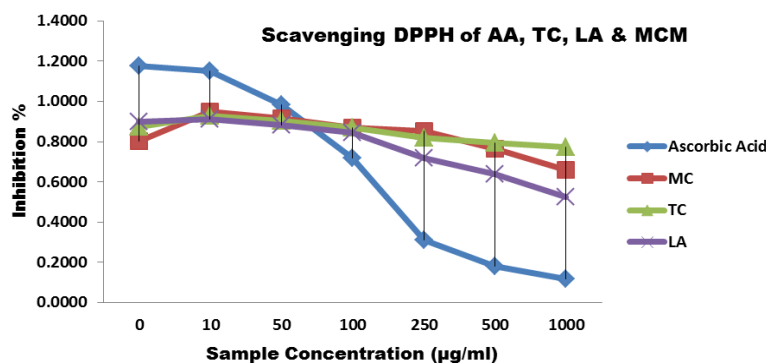

**Figure 1.** DPPH radical scavenging activity of AA, TC, LA & MCM. Data are presented as Mean $\pm$ SD, n=3 experiments.

### CONCLUSIONS

These plant based antioxidants are thought to work more biologically than synthetic ones. The results of this study indicated that the whole plants of TC, LA & MCM are good sources of functional ingredients which exert significant antioxidant activity on comparing with standard ascorbic acid.

### REFERENCES

- [1] Harborne JB. Methods of plant analysis. In *Phytochemical methods* 1984 (pp. 1-36). Springer, Dordrecht. [2] Harborne AJ. *Phytochemical methods a guide to modern techniques of plant analysis*. Springer science & business media; 1998 Apr 30. [3] Koleva II, Van Beek TA, Linsen JP, Groot AD, Evstatieva LN. Screening of plant extracts for antioxidant activity: a comparative study on three testing methods. *Phytochemical Analysis: An International Journal of Plant Chemical and Biochemical Techniques*. 2002 Jan;13(1):8-17.
